# Supplementary material for: Regulation of alternative polyadenylation by Nkx2-5 and Xrn2 during mouse heart development
Source: eLife. 2016 Jun 22;5:e16030. doi: 10.7554/eLife.16030 (PMC4982761; doi:10.7554/eLife.16030)
Supplement: Figure 2—source data 1. — Numeric data for Figure 2B,C,D,E,F, Figure 2—figure supplement 1A,B, Figure 2—figure supplement 3A,B. DOI: http://dx.doi.org/10.7554/eLife.16030.015 [file elife-16030-fig2-data1.xlsx]

## Sheet: Sheet1
Fig2B	Tnnt2-exon1	Tnnt2-3	Atp2a2-ChIP5	Atp2a2-3	H1foo
	0.320422	0.529499	0.609517	0.418436	0.0104691
	0.502703	0.775725	0.523756	0.696673	0.0164002
	0.348452	0.549875	0.264632	0.486149	0.0197639
Fig2C		Tnnt2-exon1	Tnnt2-3
	siControl	1	1
		1	1
		1	1
	siNkx	2.22867	2.21787
		0.35029	1.68279
		0.62184	1.77206
Fig2D		Atp2a2-ChIP5	Atp2a2-3
	siControl	1	1
		1	1
		1	1
	siNkx	1.60105	1.92227
		1.21033	1.57738
		0.776279	1.53111
Fig2E		Tnnt2-RT	Atp2a2-RT
	siControl	1	1
		1	1
		1	1
	siNkx2-5	1.77139	1.67666
		1.10678	1.19516
		1.16731	1.69297
	siGata4	1.34277	1.00588
		0.699295	1.07181
		0.884423	1.0662
	siTbx5	1.65057	1.015
		1.10012	0.812864
		1.16297	1.20044
Fig2F		Tnnt2-3	Atp2a2-3
	siControl	1	1
		1	1
		1	1
	siNkx2-5	3.70337	2.59824
		4.25178	1.38981
		1.54153	2.23503
	siGata4	2.82353	1.38829
		3.33135	1.32911
		1.23603	1.025
	siTbx5	1.87308	1.02668
		1.20833	0.837303
		1.21131	0.861064
Fig2-S1A		Tnnt2		Atp2a2
	siControl	1	siControl	1
	siControl	1	siControl	1
	siControl	1	siControl	1
	siControl	1	siControl	1
	siControl	1	siGata4	1.0856
	siGata4	5.59864	siGata4	1.06483
	siGata4	0.350687	siGata4	0.542558
	siGata4	0.093076	siGata4	0.727935
	siGata4	0.0147458	siNkx2-5	0.293893
	siGata4	0.489071	siNkx2-5	0.662683
	siNkx2-5	0.25065	siNkx2-5	0.47965
	siNkx2-5	0.288234	siNkx2-5	0.268286
	siNkx2-5	0.251936	siTbx5	1.10629
	siNkx2-5	0.0378629	siTbx5	0.804923
	siNkx2-5	0.0867938	siTbx5	0.444856
	siTbx5	1.93757	siTbx5	0.680202
	siTbx5	0.118389
	siTbx5	0.060751
	siTbx5	0.723202
	siTbx5	1.98115
Fig2-S1B		TnC	Atp2a2
	siControl	1	1
		1	1
		1	1
	siNkx2-5	0.357845	0.332463
		0.685715	0.145698
		0.647231	0.631456
	siXrn2	0.544706	0.201554
		0.832956	0.224611
		0.848894	0.137376
Fig2-S3A		Nkx2-5	Gata4	Tbx5	Rplp2
	siNkx1-8957	0.528834	0.889952	0.716485	1.03224
	siNkx1-8957	0.542118	1.01571	0.823146	0.999699
	siNkx1-8957	0.482707	0.959444	0.828033	0.96806
	siNkx2-8958	0.378565	0.922916	0.707419	0.983142
	siNkx2-8958	0.381447	0.900855	0.770621	0.997372
	siNkx2-8958	0.41606	0.867409	0.810352	1.01949
	siNkx3-8959	0.398958	1.00384	0.917493	1.01662
	siNkx3-8959	0.409739	0.831819	0.930175	0.877235
	siNkx3-8959	0.425731	0.905988	0.962844	1.10614
	siGata1-5092	0.906548	0.275761	1.44927	0.914873
	siGata1-5092	0.835332	0.286796	1.27641	1.01283
	siGata1-5092	0.852669	0.275851	1.4251	1.07229
	siGata2-5093	0.963392	0.370279	0.883141	0.893682
	siGata2-5093	1.06477	0.431027	1.05601	1.08952
	siGata2-5093	1.10722	0.470611	0.984923	1.0168
	siGata3-5094	0.838976	0.242927	0.962899	0.975202
	siGata3-5094	0.66801	0.241038	0.924467	1.05424
	siGata3-5094	0.724062	0.225386	0.872141	0.970554
	siTbx1-9158	1.16443	1.14222	0.436101	1.03817
	siTbx1-9158	1.13535	1.01383	0.463783	0.937111
	siTbx1-9158	0.952845	0.986356	0.449307	1.02472
	siTbx2-9159	0.579612	0.777072	0.246429	0.975159
	siTbx2-9159	0.698606	0.850001	0.285629	1.05368
	siTbx2-9159	0.772497	0.806664	0.304629	0.971163
	siTbx3-9160	0.785823	0.970838	0.215953	1.01096
	siTbx3-9160	0.882968	0.988671	0.23115	1.03616
	siTbx3-9160	0.955084	0.973439	0.214472	0.95288
	siControl	0.912789	0.976098	1.06559	1.04609
	siControl	1.02715	0.933213	1.09518	0.962499
	siControl	1.06006	1.09069	0.839228	0.991414
Fig2-S3B		Tnnt2-3	Atp2a2-3	Rplp2
	siNkx1-8957	1.94801	1.42377	1.03224
	siNkx1-8957	2.37849	1.25474	0.999699
	siNkx1-8957	1.9643	1.10286	0.96806
	siNkx2-8958	1.92773	1.59053	0.983142
	siNkx2-8958	1.49442	1.71558	0.997372
	siNkx2-8958	1.59156	1.79989	1.01949
	siNkx3-8959	2.1865	1.51191	1.01662
	siNkx3-8959	1.60954	1.28389	0.877235
	siNkx3-8959	1.52153	1.47775	1.10614
	siGata1-5092	1.93414	0.709879	0.914873
	siGata1-5092	0.934378	0.647878	1.01283
	siGata1-5092	0.824137	0.717018	1.07229
	siGata2-5093	0.851027	0.843833	0.893682
	siGata2-5093	0.933726	0.94571	1.08952
	siGata2-5093	0.849961	0.738893	1.0168
	siGata3-5094	1.71159	0.98495	0.975202
	siGata3-5094	1.51368	0.960343	1.05424
	siGata3-5094	1.59538	0.958797	0.970554
	siTbx1-9158	1.93388	0.982562	1.03817
	siTbx1-9158	1.56251	1.10656	0.937111
	siTbx1-9158	1.52802	1.00429	1.02472
	siTbx2-9159	1.809	0.718316	0.975159
	siTbx2-9159	1.7937	0.7562	1.05368
	siTbx2-9159	1.87366	0.725651	0.971163
	siTbx3-9160	1.88353	0.827487	1.01096
	siTbx3-9160	3.57982	0.894958	1.03616
	siTbx3-9160	1.54377	0.860105	0.95288
	siControl	0.943748	0.924449	1.04609
	siControl	0.914387	1.08273	0.962499
	siControl	1.14186	0.992824	0.991414
