# Supplementary material for: Regulation of alternative polyadenylation by Nkx2-5 and Xrn2 during mouse heart development
Source: eLife. 2016 Jun 22;5:e16030. doi: 10.7554/eLife.16030 (PMC4982761; doi:10.7554/eLife.16030)
Supplement: Figure 4—source data 1. — Numeric data for Figure 4B,C,D,E,G, Figure 4—figure supplement 1B, Figure 4—figure supplement 2. DOI: http://dx.doi.org/10.7554/eLife.16030.022 [file elife-16030-fig4-data1.xlsx]

## Sheet: Sheet1
Fig4B		Tnnt2-3	Atp2a2-3
	siControl	1	1
		1	1
		1	1
	siXRN2-#1	2.05446	1.26979
		1.947	1.39995
		1.51895	1.42312
	siXRN2-#2	1.33432	1.13151
		2.01861	1.5141
		1.78686	1.95036
Fig4C		Tnnt2-RT	Atp2a2-RT3	XRN2-RT1
	siControl	1	1	1
		1	1	1
		1	1	1
	siXRN2-#1	0.958906	1.11712	0.288069
		1.16167	1.14802	0.249168
		1.56601	1.29435	0.248287
	siXRN2-#2	0.797695	1.01867	0.160029
		0.991999	1.3292	0.161827
		1.26405	1.59143	0.195316
Fig4D		XRN2
	siControl	1
		1
		1
	siNkx2-5	1.1134
		1.10763
		1.00194
	siGata4	0.730004
		1.3251
		0.961343
	siTbx5	0.835227
		1.16651
		0.734667
Fig4E		Tnnt2-TSS	Tnnt2-exon10	Tnnt2-3UTR	Tnnt2-3	Atp2a2-TSS	Atp2a2-3UTR	Atp2a2-3
	siControl	1	1	1	1	1	1	1
	siControl	1	1	1	1	1	1	1
	siControl	1	1	1	1	1	1	1
	siNkx	0.86015	2.02666	1.62581	0.529595	0.522256	1.20585	1.3394
	siNkx	0.551844	1.24352	0.38869	0.276407	0.365373	0.573145	0.379941
	siNkx	0.778963	0.220723	0.721371	0.744653	0.58611	0.694141	0.722278
Fig4G		Tnnt2			Atp2a2
	siNkx2-5	2.15949		siNkx2-5	2.89928
		2.35749			3.68916
		2.17774			3.17794
	siControl	0.70033		siControl	0.989297
		1.39774			1.0306
		0.901928			0.980106
	siXrn2	1.62656		siXrn2	2.11832
		1.75473			1.89352
		1.52493			1.69299
Fig4-S1B		Tnnt2-3	Atp2a2-3
	siControl	0.913072	1.01937
		1.01078	1.03051
		1.07615	0.95012
	siNkx2-5	1.40158	2.01676
		1.45628	2.12319
		1.74988	1.98059
	siXrn2	1.43193	1.21841
		1.50197	1.41318
		1.86388	1.42373
Fig4-S2		Myl7-TSS	Myl7-exon4	Myl7-TTS	Myl7-3
	siControl	0.559204	0.38885	1.05493	1.38694
		0.762638	1.49587	1.27701	0.632737
		1.67816	1.11528	0.668063	0.980318
	siNkx2-5	1.30191	0.941268	0.316134	0.250159
		0.634845	0.27841	1.4542	0.376656
		0.644927	1.27196	2.02799	0.105629
