# Supplementary material for: Regulation of alternative polyadenylation by Nkx2-5 and Xrn2 during mouse heart development
Source: eLife journal article supplement (doi:10.7554/elife.16030), 2016-06-22
Supplement: supp [file elife-16030-supp-v1.zip]

**A**

| Gata4 | Nkx2-5 | Tbx5 | Peaks | Name              |
|-------|--------|------|-------|-------------------|
|       |        | X    | 27959 | Tbx5              |
|       | X      |      | 46110 | Nkx2-5            |
|       | X      | X    | 62061 | Nkx2-5 Tbx5       |
| X     |        |      | 473   | Gata4             |
| X     |        | X    | 19    | Gata4 Tbx5        |
| X     | X      |      | 33    | Gata4 Nkx2-5      |
| X     | X      | X    | 629   | Gata4 Nkx2-5 Tbx5 |

**B**

| E12.5 | HL1_BirA | Adult | Peaks | Name                                |
|-------|----------|-------|-------|-------------------------------------|
|       |          | X     | 13527 | Adult (van den Boogaard et al. JCI) |
|       | X        |       | 85151 | HL1_BirA (He et al. PNAS)           |
|       | X        | X     | 5322  | Adult HL1_BirA                      |
| X     |          |       | 90399 | E12.5 (This study)                  |
| X     |          | X     | 3826  | E12.5 Adult                         |
| X     | X        |       | 14357 | E12.5 HL1_BirA                      |
| X     | X        | X     | 6212  | E12.5 HL1_BirA Adult                |

**C**

| E12.5 | HL1_BirA | Peaks  | Name           |
|-------|----------|--------|----------------|
|       | X        | 112672 | HL1_BirA       |
| X     |          | 76142  | E12.5          |
| X     | X        | 21755  | E12.5 HL1_BirA |

**D**

| Gata4_ChIP_exp1 (He et al.) | Gata4_ChIP_exp2 (He et al.) | Gata4 (this study) | Peaks  | Name                                                                       |
|-----------------------------|-----------------------------|--------------------|--------|----------------------------------------------------------------------------|
|                             |                             | X                  | 828    | Gata4 (this study)                                                         |
|                             | X                           |                    | 62170  | Gata4_ChIP_exp2 (He et al.)                                                |
|                             | X                           | X                  | 43     | Gata4_ChIP_exp2 (He et al.) Gata4 (this study)                             |
| X                           |                             |                    | 197982 | Gata4_ChIP_exp1 (He et al.)                                                |
| X                           |                             | X                  | 133    | Gata4_ChIP_exp1 (He et al.) Gata4 (this study)                             |
| X                           | X                           |                    | 20133  | Gata4_ChIP_exp1 (He et al.) Gata4_ChIP_exp2 (He et al.)                    |
| X                           | X                           | X                  | 160    | Gata4_ChIP_exp1 (He et al.) Gata4_ChIP_exp2 (He et al.) Gata4 (this study) |

**Figure 1-figure supplement4**
