# Supplementary material for: Regulation of alternative polyadenylation by Nkx2-5 and Xrn2 during mouse heart development
Source: eLife journal article supplement (doi:10.7554/elife.16030), 2016-06-22
Supplement: supp [file elife-16030-supp-v1.zip]

|                                                | motif                                                                                | P value |
|------------------------------------------------|--------------------------------------------------------------------------------------|---------|
| Nkx2-5                                         |    | 1E-152  |
| MA0063.1_Nkx2-5/Jaspar                         |    |         |
|                                                | motif                                                                                | P value |
| Tbx5                                           |    | 1E-149  |
| Eomes(T-box)/H9-Eomes-ChIP-Seq(GSE26097)/Homer |    |         |
|                                                | motif                                                                                | P value |
| Gata4                                          |  | 1E-184  |
| Gata4                                          |  | 1E-14   |
| Gata4(Zf)/Heart-Gata4-ChIP-Seq(GSE35151)/Homer |  |         |

Figure 1-figure supplement 3
