# Supplementary figures and images for: Regulation of alternative polyadenylation by Nkx2-5 and Xrn2 during mouse heart development
Source: eLife journal article supplement (doi:10.7554/elife.16030), 2016-06-22

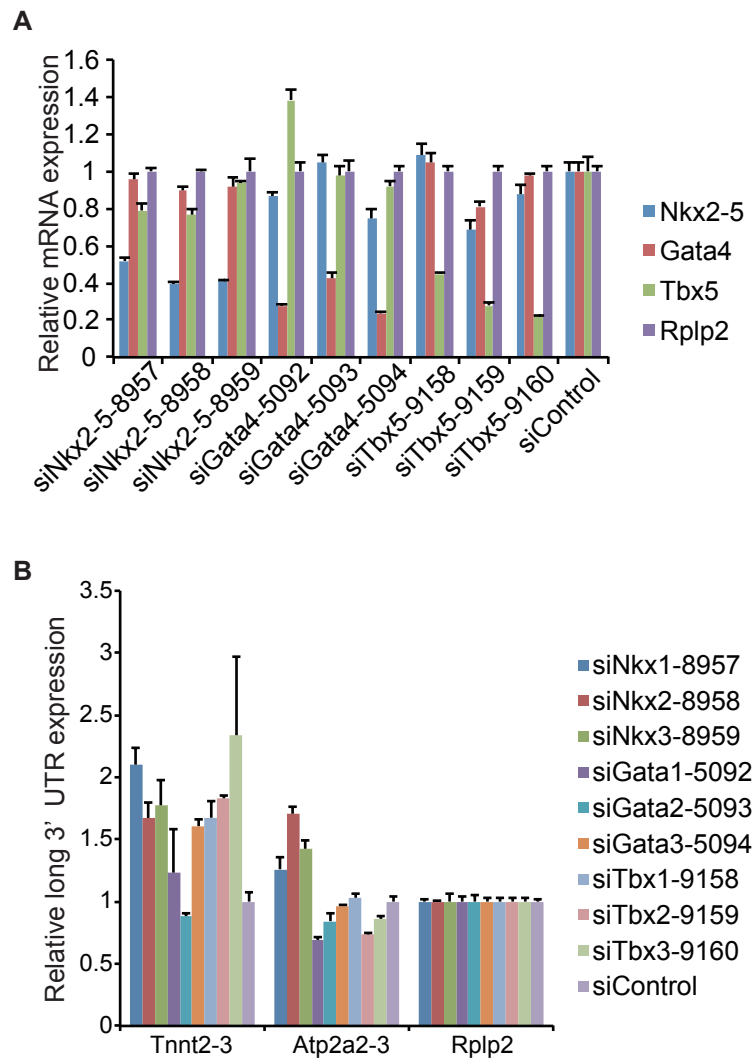

**Figure 2-figure supplement 3**

Supplement: supp [file elife-16030-supp-v1.zip]

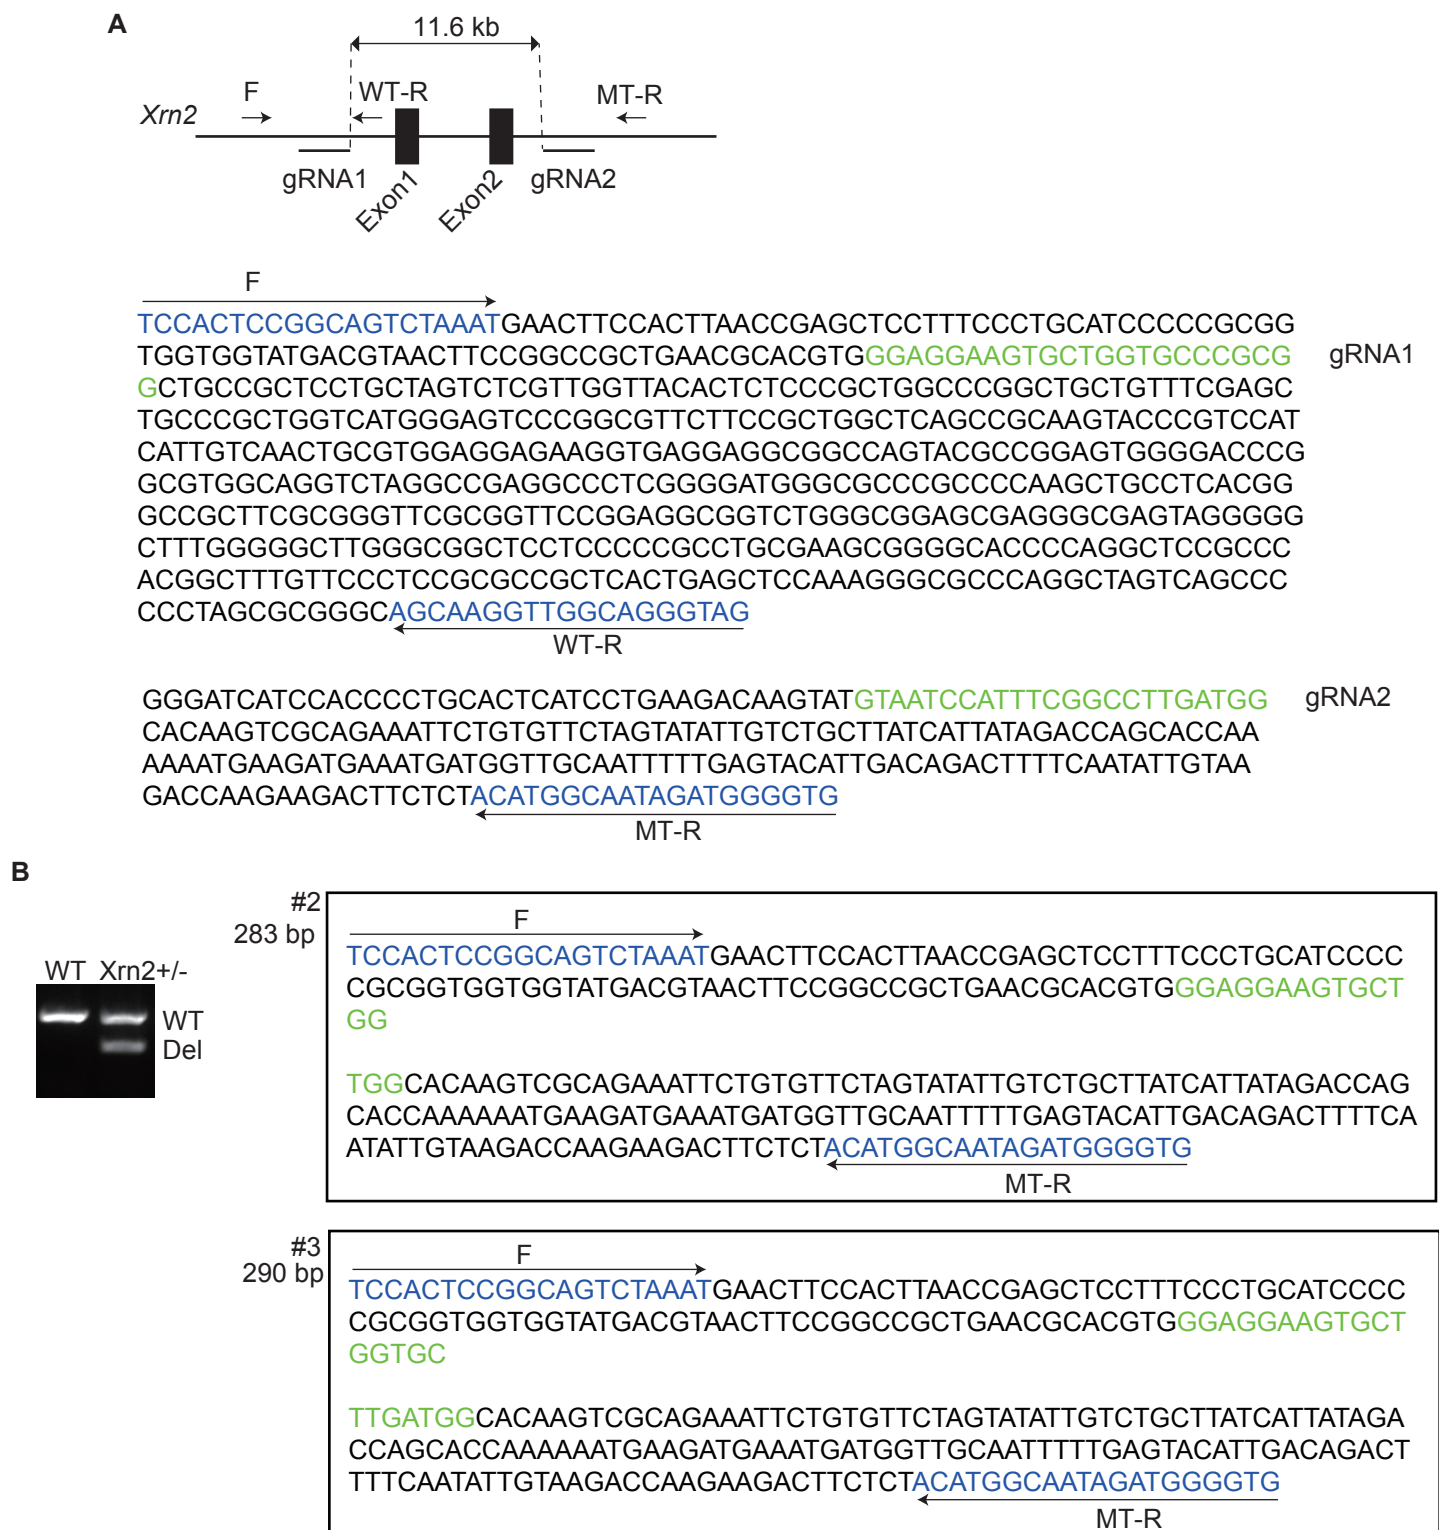

Figure 6-figure supplement 1

Supplement: supp [file elife-16030-supp-v1.zip]

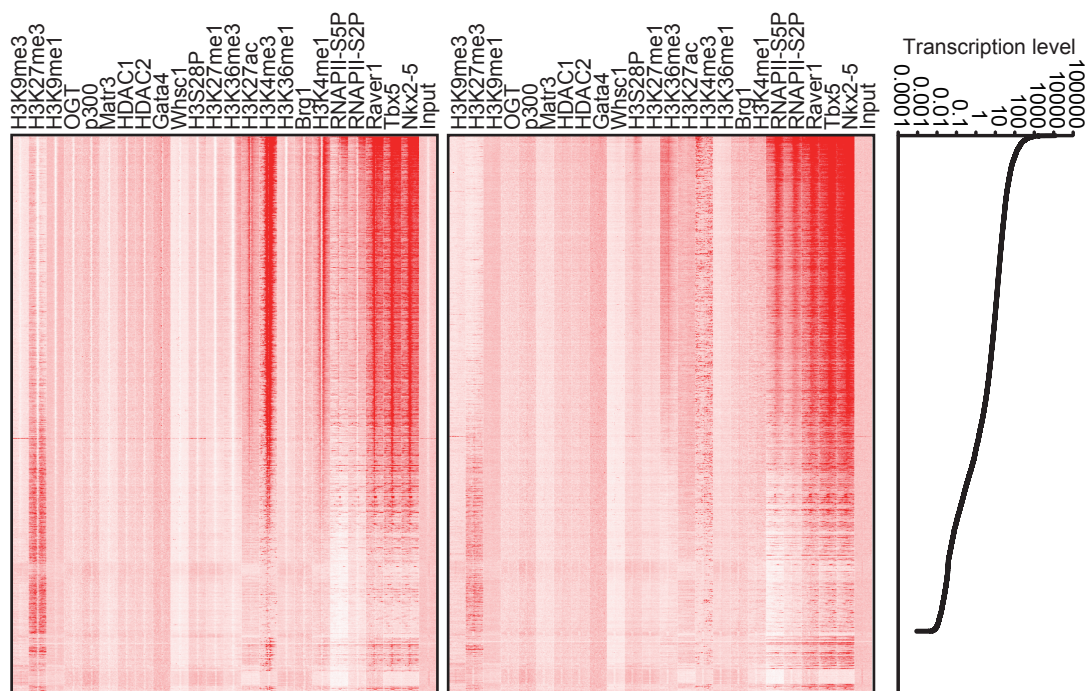

Figure 1-figure supplement 7

Supplement: supp [file elife-16030-supp-v1.zip]

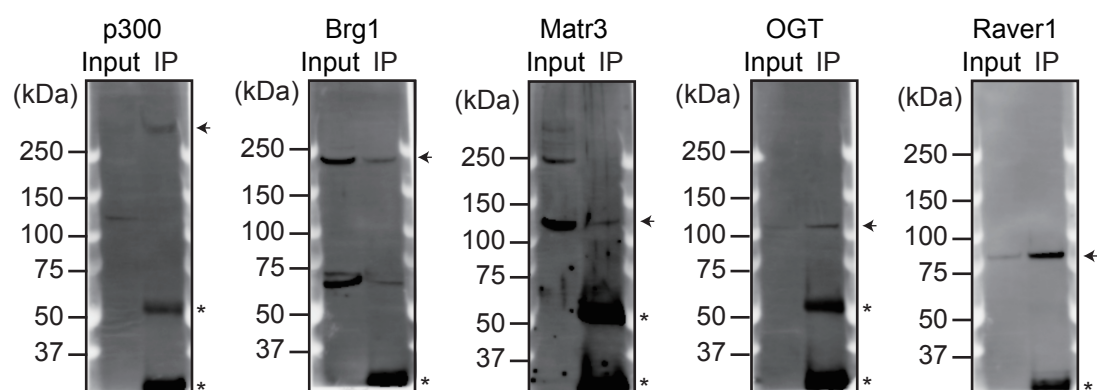

**Figure 1-figure supplement 5**

Supplement: supp [file elife-16030-supp-v1.zip]

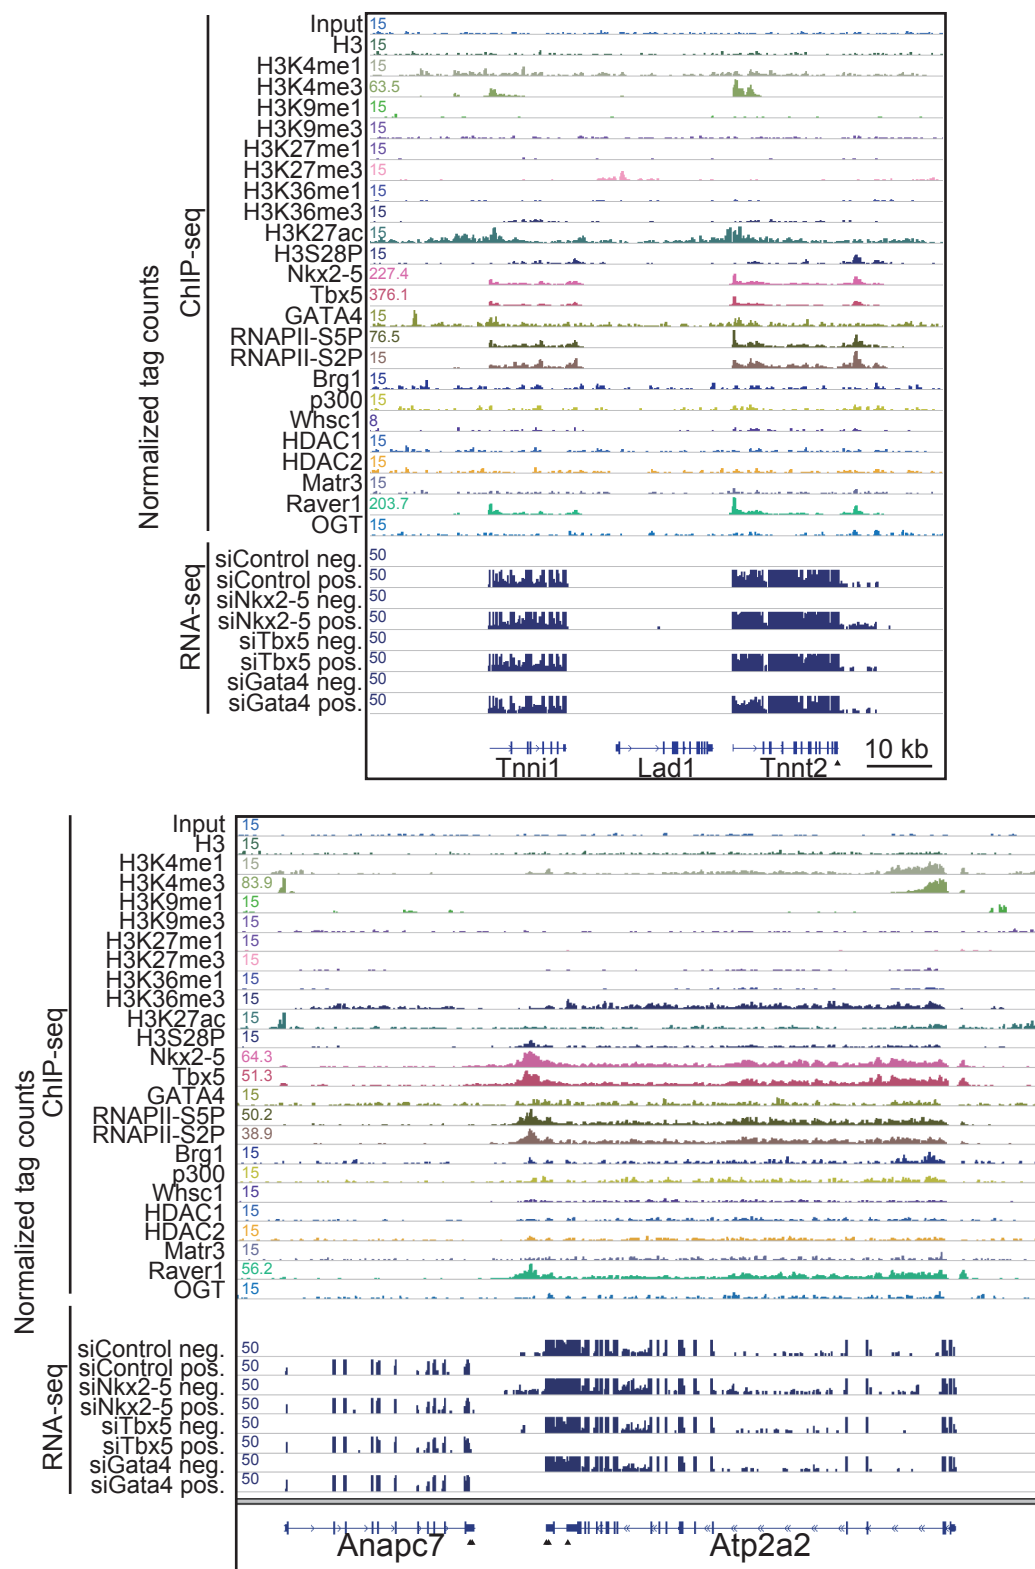

Figure 1-figure supplement 6

Supplement: supp [file elife-16030-supp-v1.zip]

A

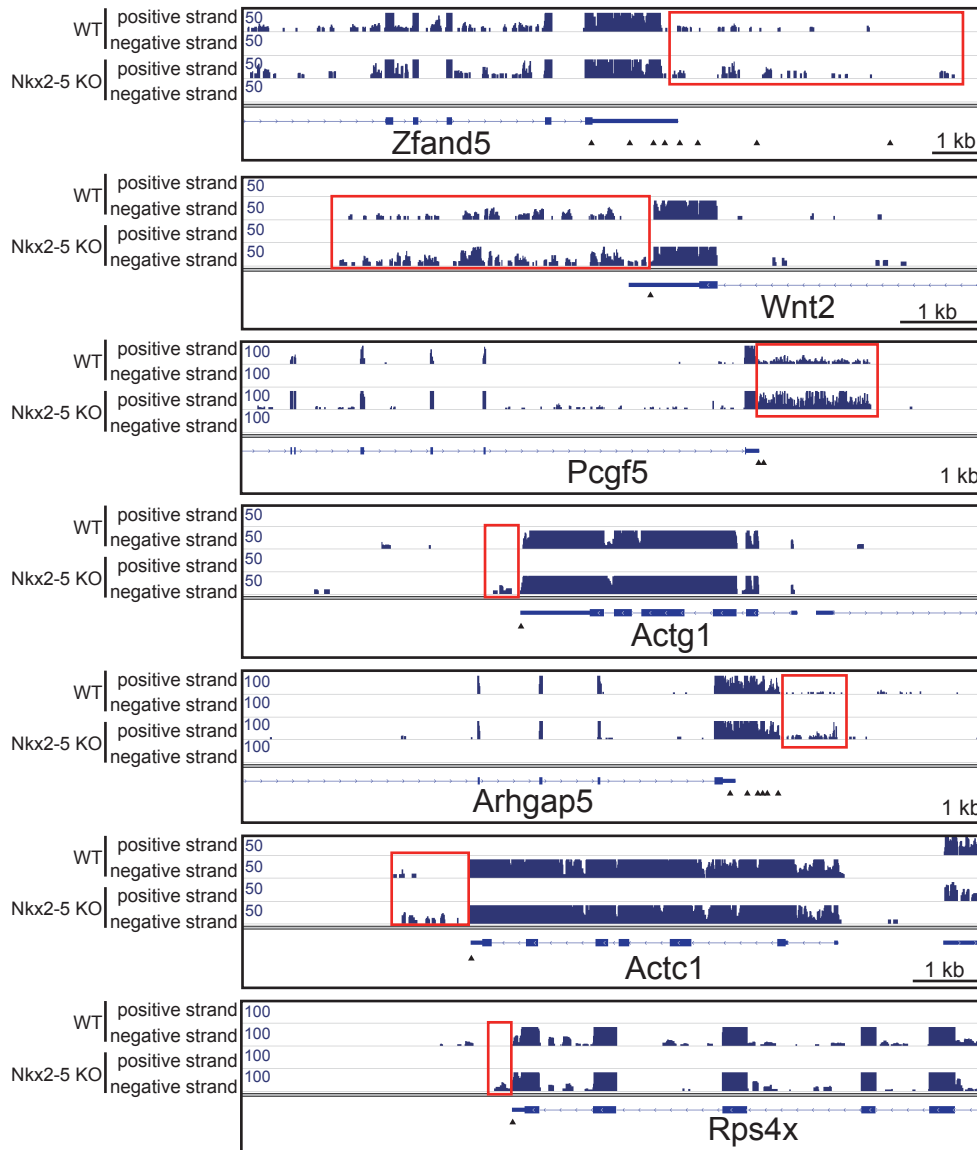

B

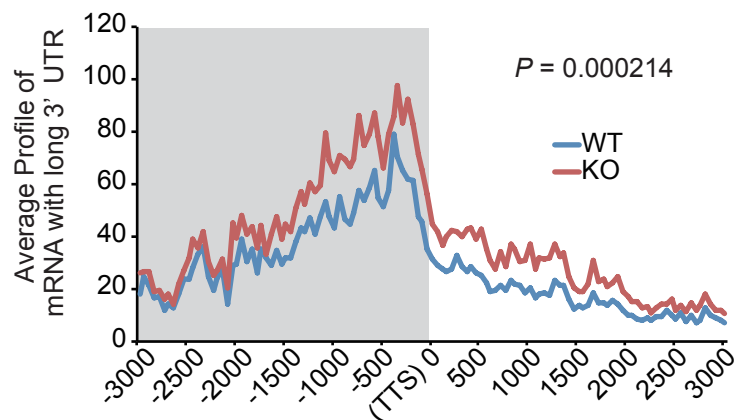

Figure 1-figure supplement 10

Supplement: supp [file elife-16030-supp-v1.zip]

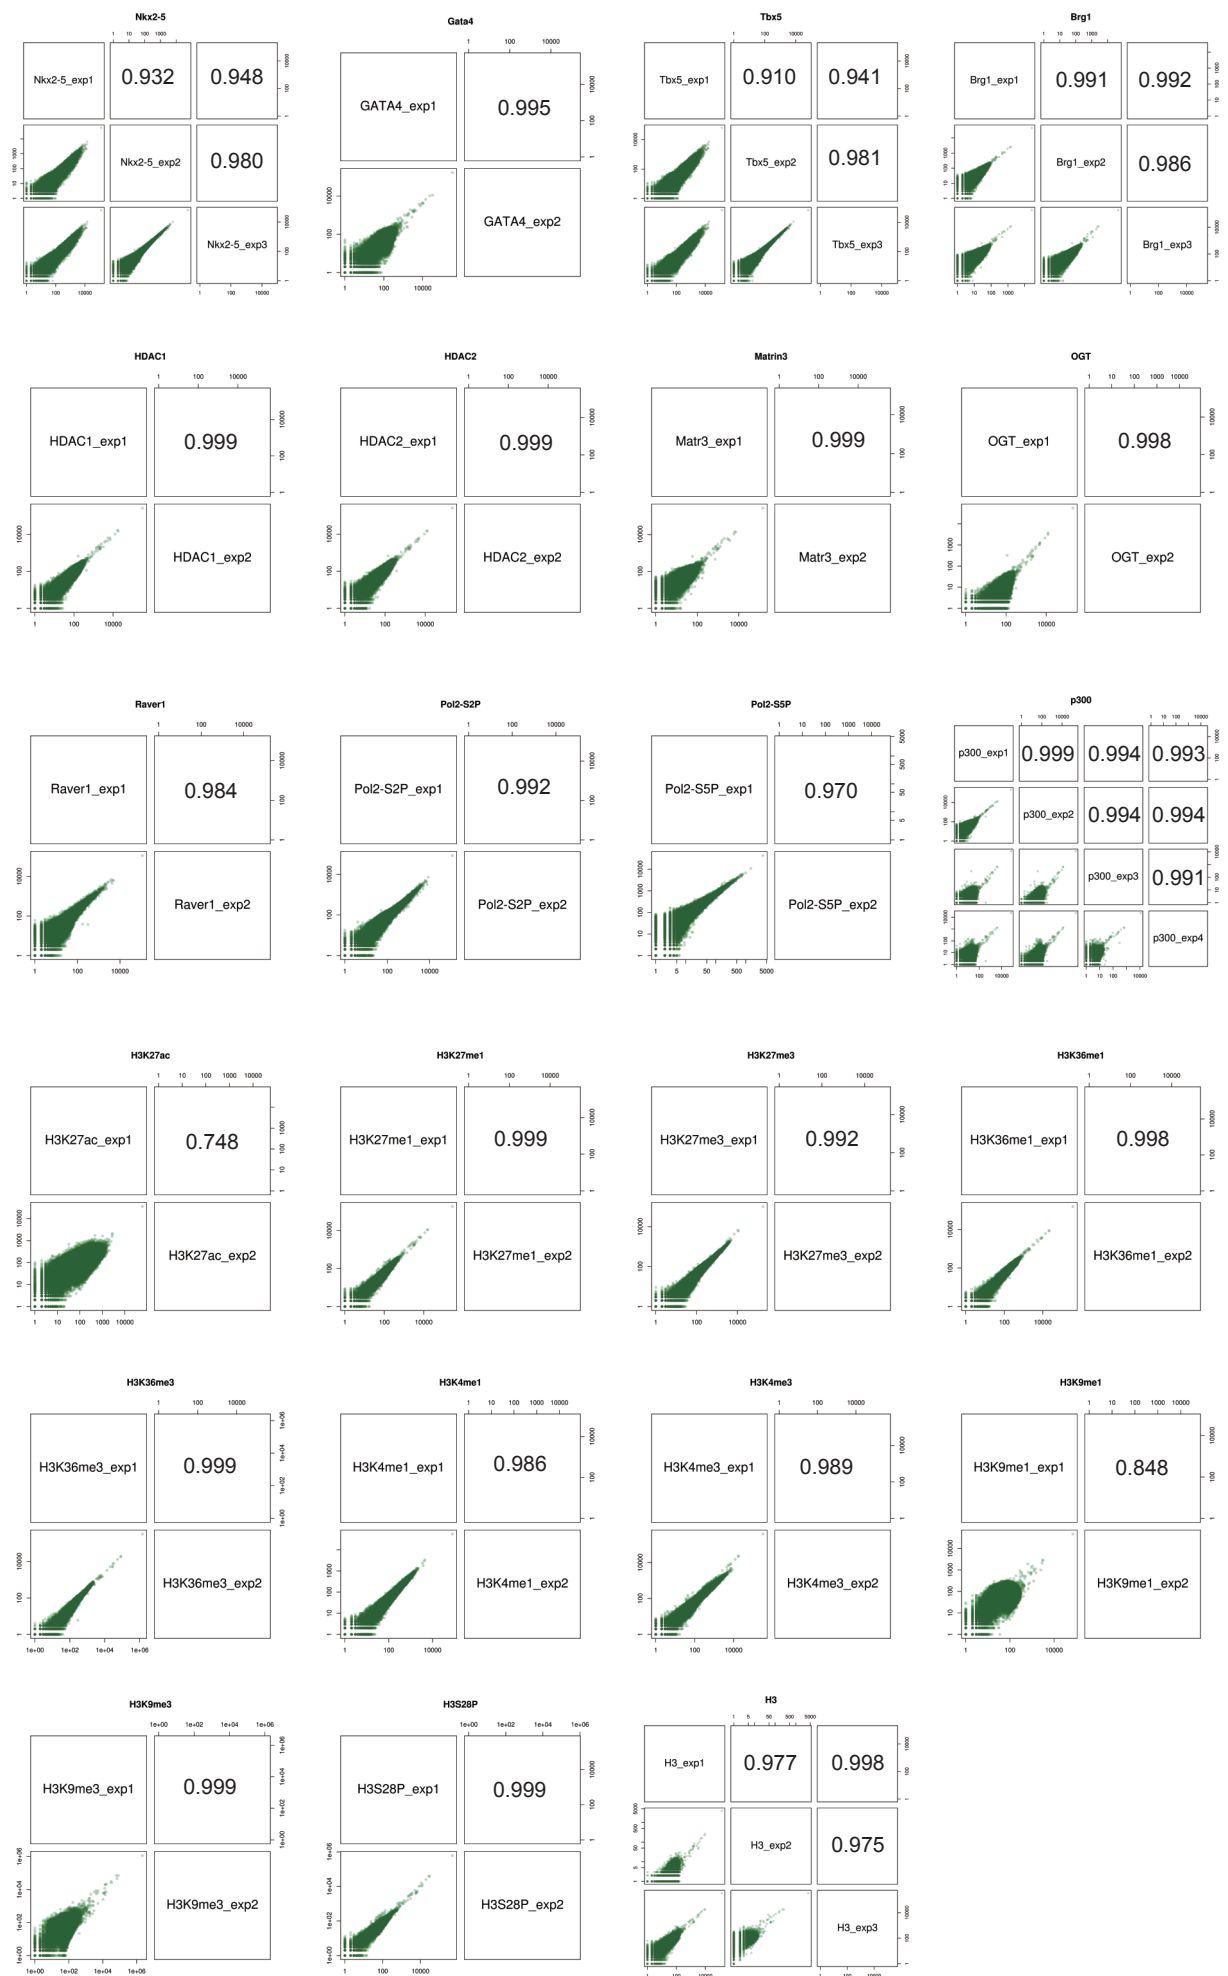

Figure 1-figure supplement2

Supplement: supp [file elife-16030-supp-v1.zip]

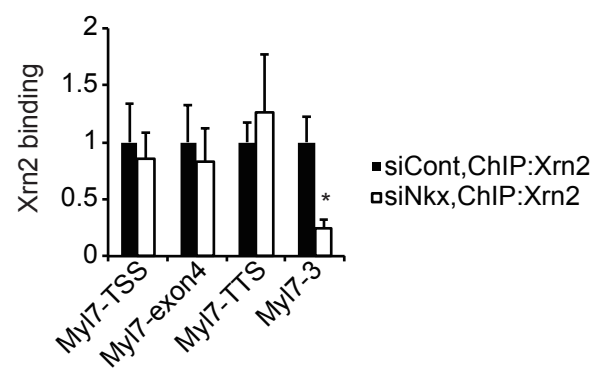

**Figure 4-figure supplement 2**

Supplement: supp [file elife-16030-supp-v1.zip]

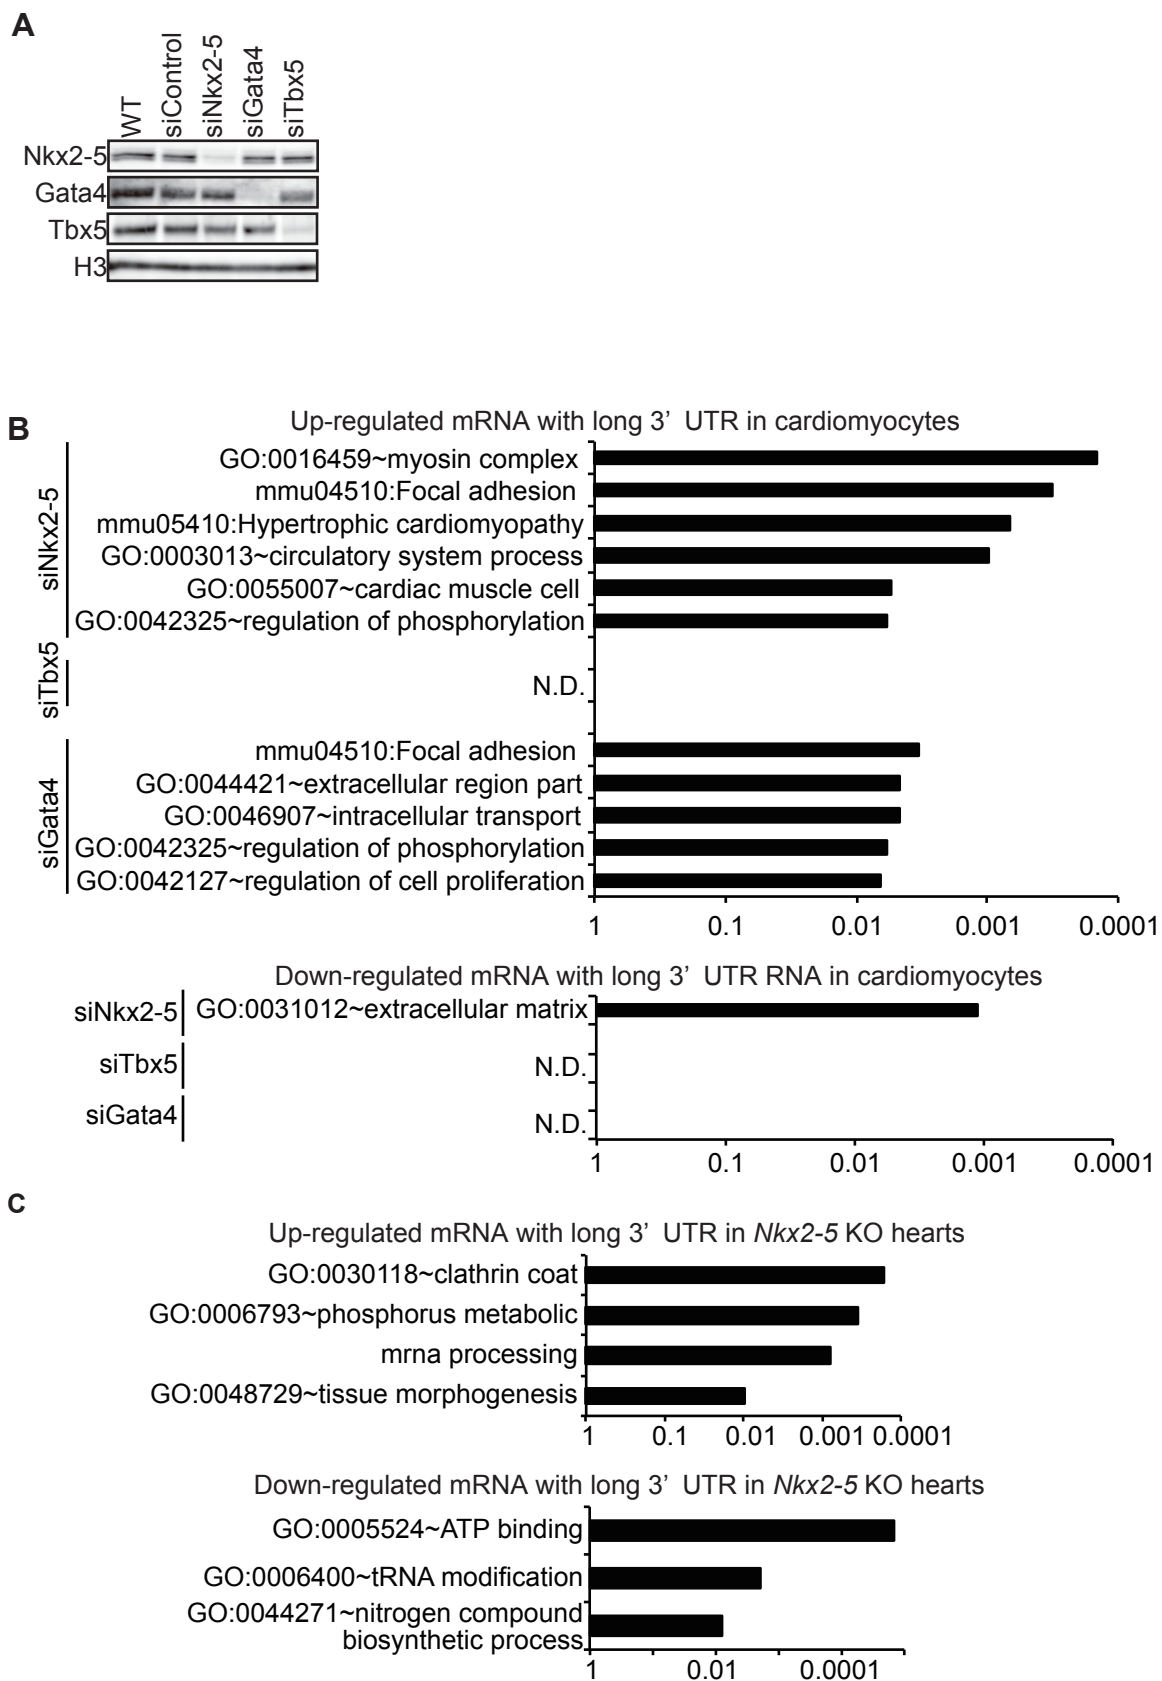

**Figure 2-figure supplement 4**

Supplement: supp [file elife-16030-supp-v1.zip]

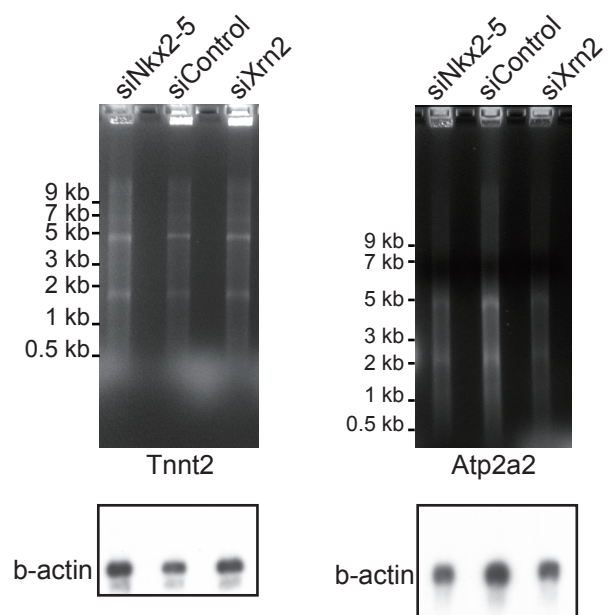

Figure 4-figure supplement 3

Supplement: supp [file elife-16030-supp-v1.zip]

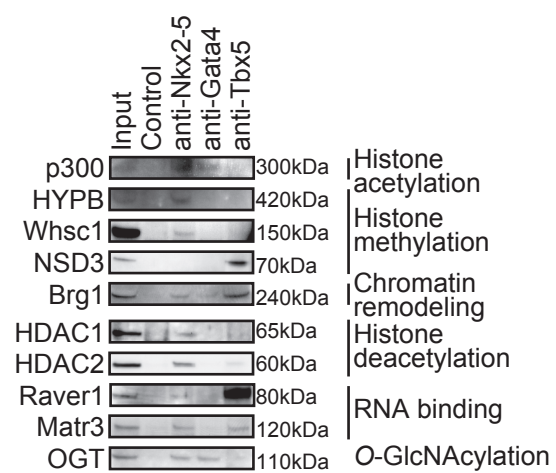

**Figure 1-figure supplement 1**

Supplement: supp [file elife-16030-supp-v1.zip]

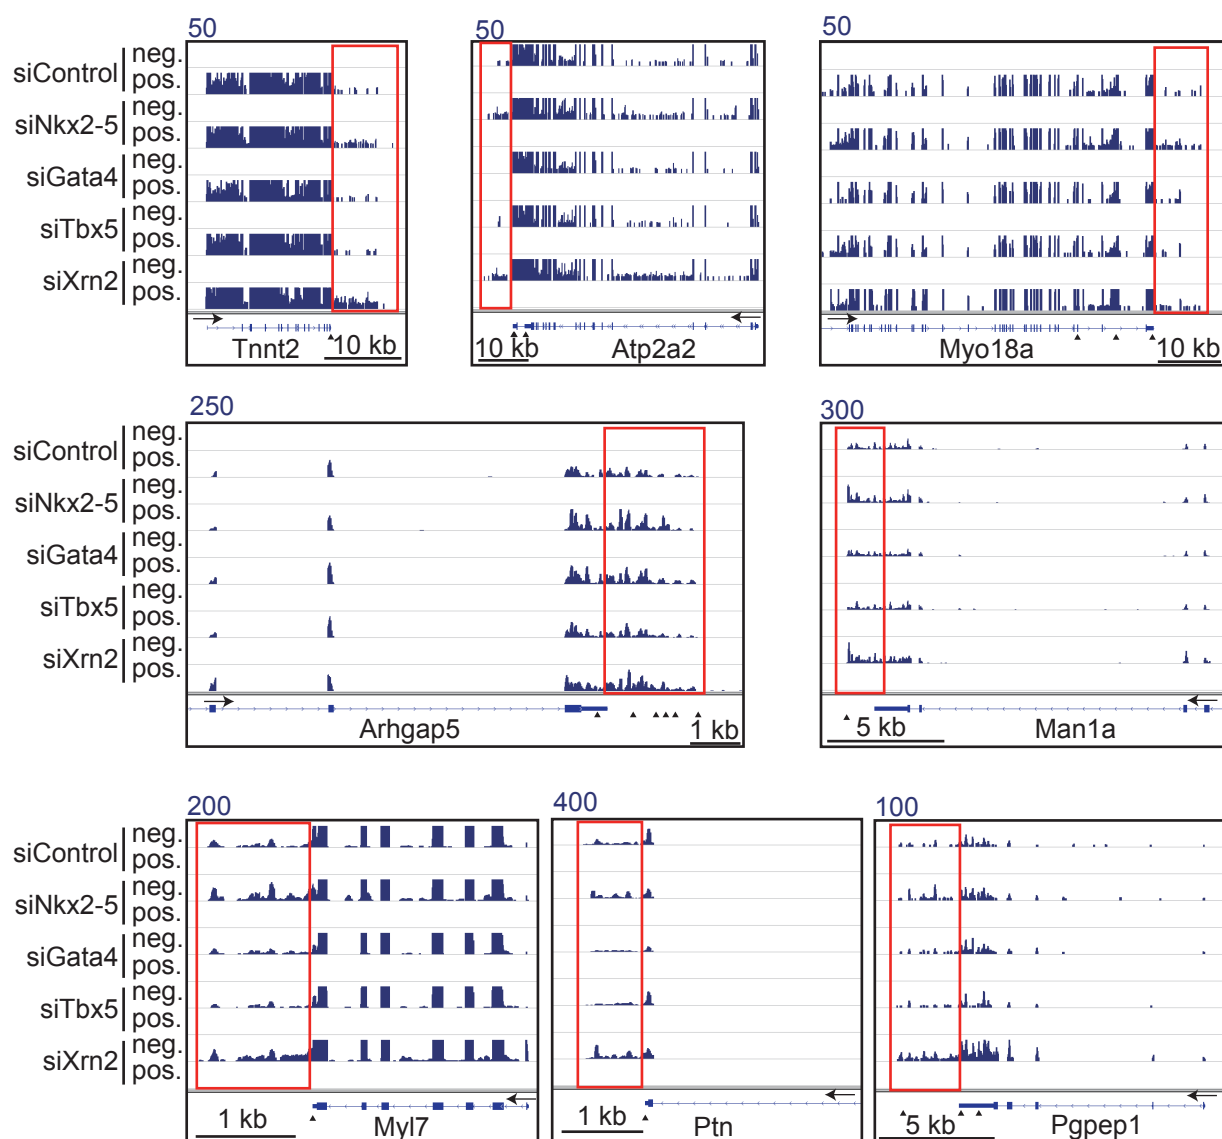

Figure 1-figure supplement 9

Supplement: supp [file elife-16030-supp-v1.zip]

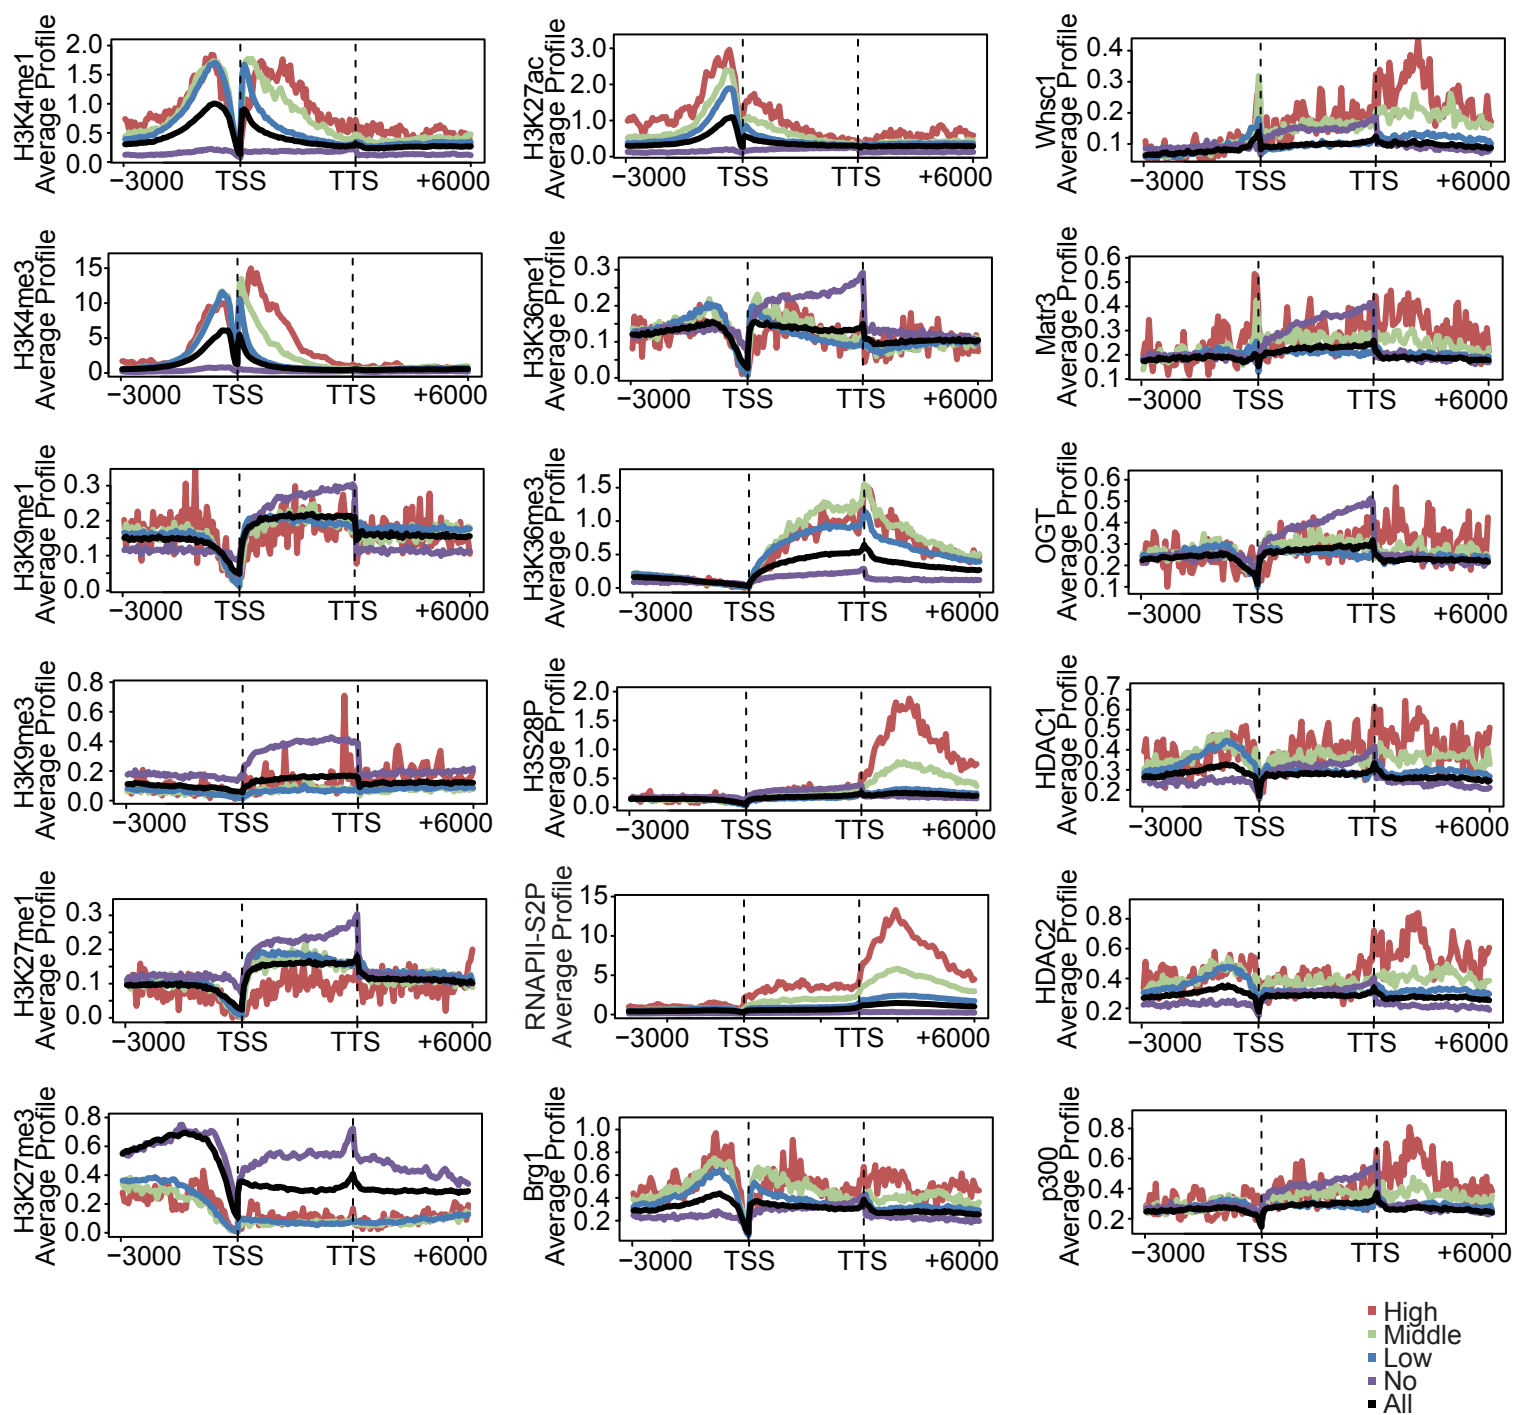

Figure 1-figure supplement 8

Supplement: supp [file elife-16030-supp-v1.zip]

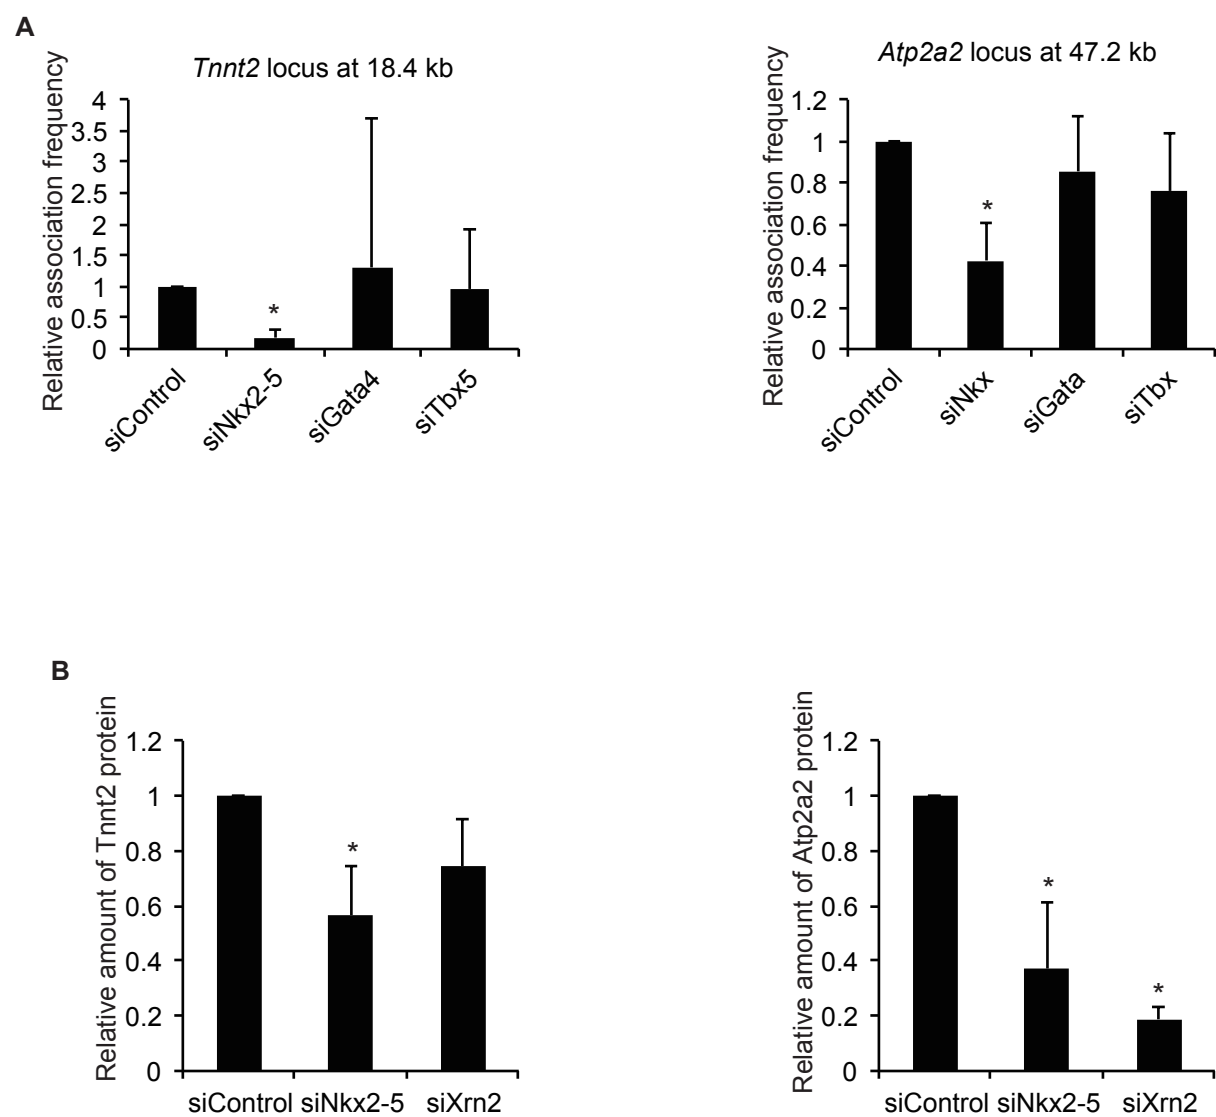

Figure 2-figure supplement 1

Supplement: supp [file elife-16030-supp-v1.zip]

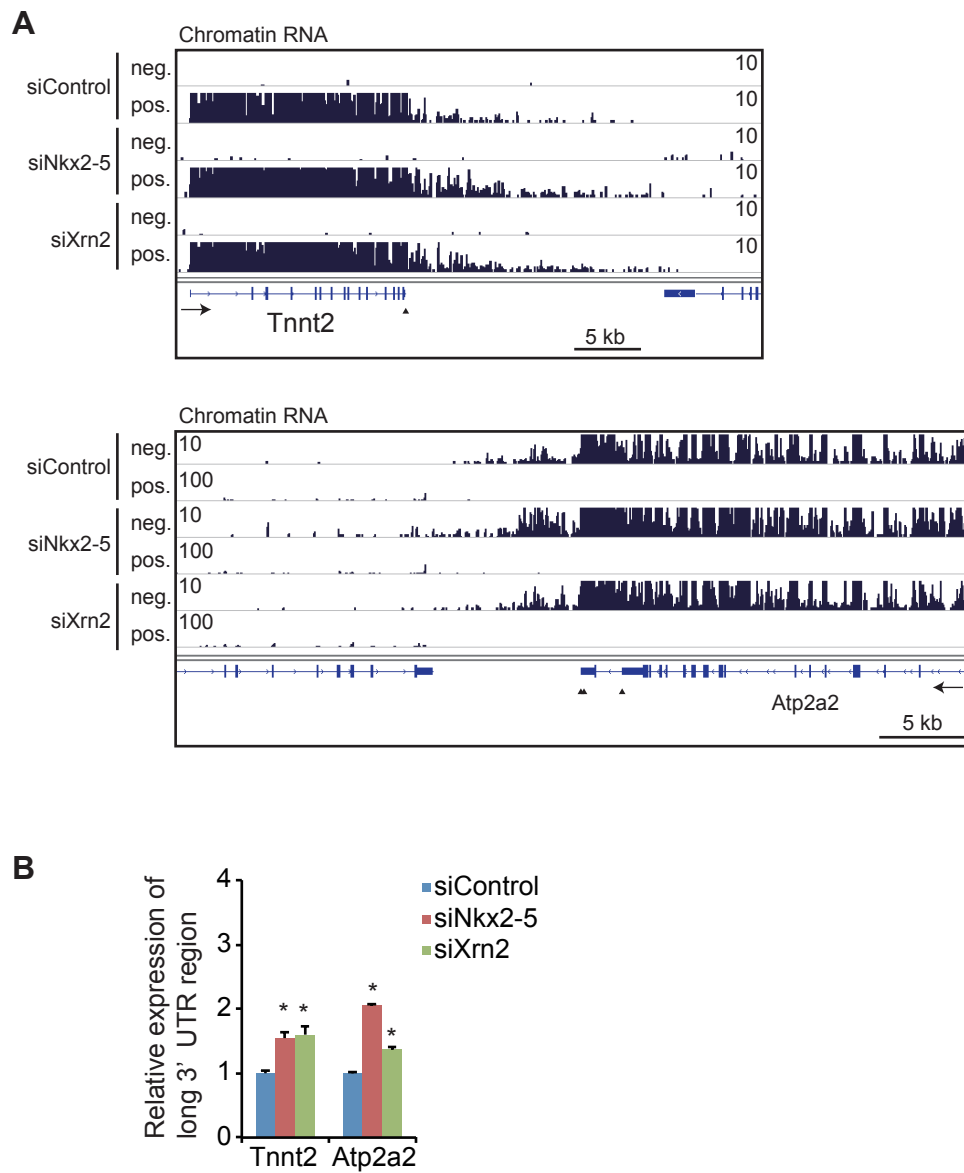

Figure 4-figure supplement 1

Supplement: supp [file elife-16030-supp-v1.zip]

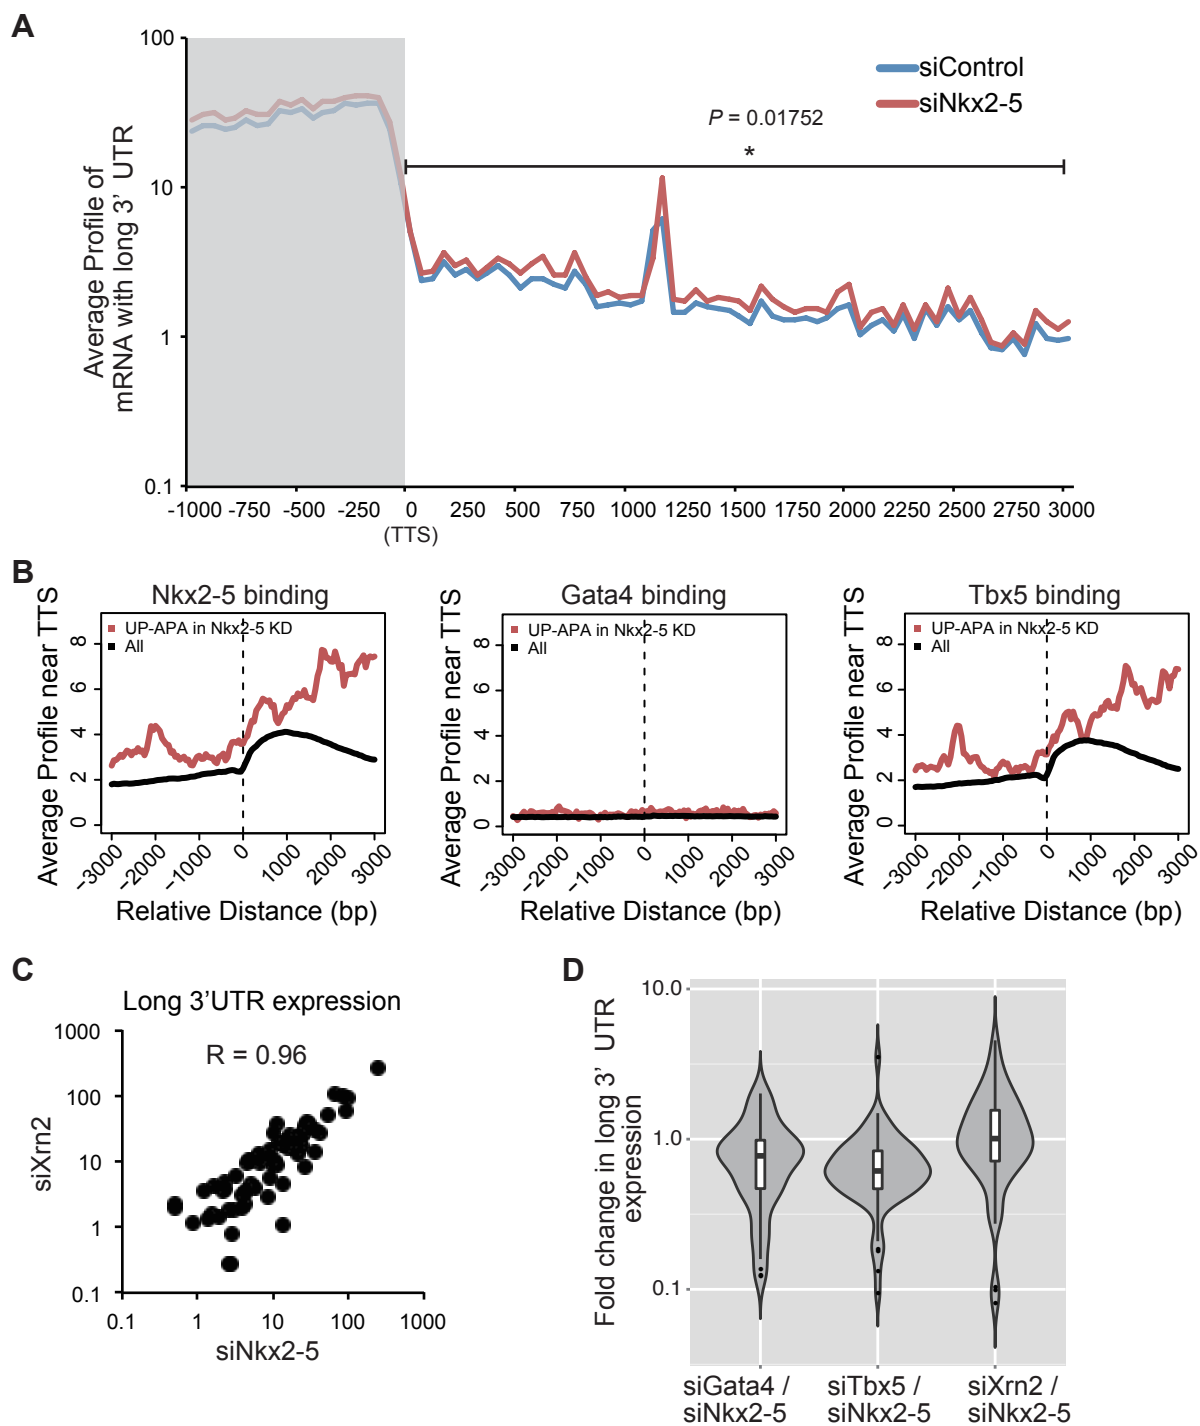

Figure 4-figure supplement 4

Supplement: supp [file elife-16030-supp-v1.zip]

**A**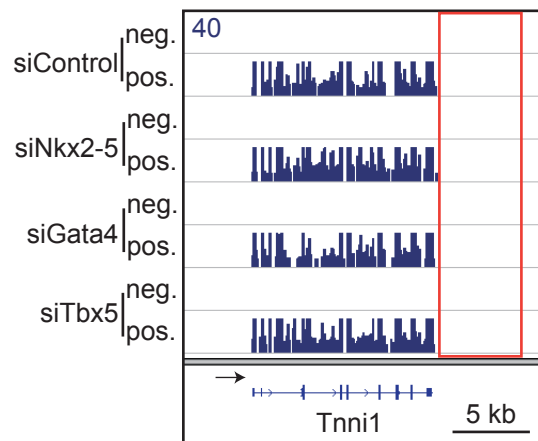**B**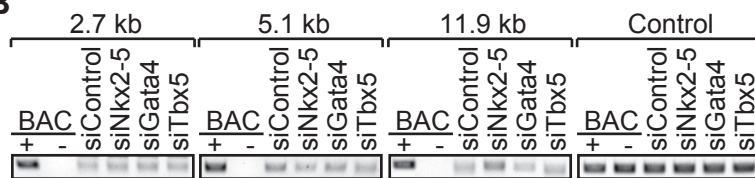

Figure 2-figure supplement 2

Supplement: supp [file elife-16030-supp-v1.zip]
